# Supplementary material
Source: publisher figshare collection journal article supplement (https://tandf.figshare.com/articles/dataset/_/5271625)
Supplement: Supplementary file 1 [file 1]

| Species                                                       | Species nr. | Rummu | Vasalemma |
|---------------------------------------------------------------|-------------|-------|-----------|
| Barrandeocerid indet                                          |             | 0     | 1         |
| <i>Beloitoceras cautis</i> sp. nov.                           | 1           | 0     | 1         |
| <i>Beloitoceras</i> sp. indet                                 |             | 0     | 1         |
| Cephalopoda indet                                             |             | 0     | 1         |
| <i>Curtoceras abditus</i> sp. nov.                            | 2           | 0     | 1         |
| <i>Discoceras raroispira</i> (Eichwald, 1860)                 | 3           | 1     | 1         |
| <i>Discoceras</i> sp.                                         |             | 0     | 3         |
| <i>Discoceras vasalemmense</i> (Balashov, 1953)               | 4           | 12    | 24        |
| <i>Hemibeloitoceras arduum</i> sp. nov.                       | 5           | 3     | 0         |
| <i>Hemibeloitoceras molis</i> sp. nov.                        | 6           | 1     | 7         |
| <i>Hemibeloitoceras</i> sp.                                   |             | 1     | 2         |
| <i>Hoeloceras muroni</i> sp. nov.                             | 7           | 1     | 0         |
| <i>Isorthoceras cavi</i> sp. nov.                             | 8           | 3     | 6         |
| <i>Isorthoceras maris</i> sp. nov.                            | 9           | 0     | 2         |
| <i>Isorthoceras padisense</i> sp. nov.                        | 10          | 2     | 0         |
| <i>Isorthoceras vexilli</i> sp. nov.                          | 11          | 1     | 2         |
| Oncoceratidae indet                                           |             | 0     | 1         |
| Oncocerida indet                                              |             | 0     | 1         |
| <i>Ordogeisonoceras tartuensis</i> sp. nov.                   | 12          | 0     | 7         |
| <i>Ordogeisonoceras?</i> sp.                                  |             | 0     | 2         |
| <i>Orthonybyoceras cf. dyeri</i> (Miller, 1875)               | 13          | 25    | 74        |
| <i>Orthonybyoceras isakari</i> sp. nov.                       | 14          | 25    | 38        |
| <i>Orthonybyoceras moisense</i> sp. nov.                      | 15          | 1     | 6         |
| <i>Orthonybyoceras</i> sp.                                    |             | 0     | 22        |
| <i>Pleurorthoceras organi</i> sp. nov.                        | 16          | 0     | 5         |
| <i>Rummoceras rummuensis</i> gen. et sp. nov.                 | 17          | 1     | 0         |
| <i>Striatocycloceras undulostriatum</i> Kröger & Isakar, 2006 | 18          | 18    | 33        |
| <i>Trocholites gennadii</i> sp. nov.                          | 19          | 0     | 2         |
| <i>Vasalemmoceras tolerabile</i> Stumbur, 1962                | 20          | 1     | 12        |
