# Supplementary material
Source: publisher figshare collection journal article supplement (https://tandf.figshare.com/articles/dataset/_/5271625)
Supplement: Supplementary file 2 [file 1]

|              | <b>Sample Size</b> | <b>N with<br/>epizoans</b> | <b>N with<br/>bryozoans</b> | <b>N with<br/>echinoderm<br/>holdfasts</b> |
|--------------|--------------------|----------------------------|-----------------------------|--------------------------------------------|
| Actinocerida | 106                | 5                          | 4                           | 1                                          |
| Discosorida  | 7                  | 3                          | 1                           | 1                                          |
| Oncocerida   | 5                  | 2                          | 2                           | 0                                          |
| Orthocerida  | 48                 | 9                          | 8                           | 1                                          |
| Tarphycerida | 29                 | 9                          | 9                           | 0                                          |
| indet        | 3                  | 2                          | 2                           | 0                                          |
