# Supplementary material
Source: publisher figshare collection journal article supplement (https://tandf.figshare.com/articles/dataset/_/5271625)
Supplement: Supplementary file 3 [file 1]

| Species                                         | Specimen number | Locality                  |
|-------------------------------------------------|-----------------|---------------------------|
| <i>DISCOCERAS VASALEMMENSE</i> (BALASHOV, 1953) | TUG 939-61      | Vasalemma                 |
| <i>DISCOCERAS VASALEMMENSE</i> (BALASHOV, 1953) | TUG 939-76      | Vasalemma                 |
| <i>DISCOCERAS VASALEMMENSE</i> (BALASHOV, 1953) | TUG 939-64      | Vasalemma                 |
| <i>DISCOCERAS VASALEMMENSE</i> (BALASHOV, 1953) | TUG 939-63      | Vasalemma                 |
| <i>DISCOCERAS VASALEMMENSE</i> (BALASHOV, 1953) | TUG 939-69      | Vasalemma                 |
| <i>DISCOCERAS VASALEMMENSE</i> (BALASHOV, 1953) | TUG 939-70      | Vasalemma                 |
| <i>DISCOCERAS VASALEMMENSE</i> (BALASHOV, 1953) | TUG 47-860      |                           |
| <i>DISCOCERAS VASALEMMENSE</i> (BALASHOV, 1953) | TUG 1307-30     | Vasalemma Quarry          |
| <i>DISCOCERAS VASALEMMENSE</i> (BALASHOV, 1953) | NM L 46527      | Rummu Quarry              |
| <i>DISCOCERAS VASALEMMENSE</i> (BALASHOV, 1953) | NM L 46528      | Rummu Quarry              |
| <i>DISCOCERAS VASALEMMENSE</i> (BALASHOV, 1953) | NM L 46529      | Rummu Quarry              |
| <i>DISCOCERAS VASALEMMENSE</i> (BALASHOV, 1953) | NM L 46530      | Rummu Quarry              |
| <i>DISCOCERAS VASALEMMENSE</i> (BALASHOV, 1953) | NM L 46531      | Rummu Quarry              |
| <i>DISCOCERAS VASALEMMENSE</i> (BALASHOV, 1953) | NM L 46532      | Rummu Quarry              |
| <i>DISCOCERAS VASALEMMENSE</i> (BALASHOV, 1953) | TUG 1644-95     | Vasalemma Quarry          |
| <i>DISCOCERAS VASALEMMENSE</i> (BALASHOV, 1953) | TUG 1644-97     |                           |
| <i>DISCOCERAS VASALEMMENSE</i> (BALASHOV, 1953) | TUG 1393-42     |                           |
| <i>DISCOCERAS VASALEMMENSE</i> (BALASHOV, 1953) | TUG 1709-15     | Rummu Quarry, Rummu 1     |
| <i>DISCOCERAS VASALEMMENSE</i> (BALASHOV, 1953) | TUG 1585-39     | Rummu Quarry, Rummu 1     |
| <i>DISCOCERAS VASALEMMENSE</i> (BALASHOV, 1953) | TUG 1393-43     | Vasalemma Quarry, reef 25 |
| <i>DISCOCERAS VASALEMMENSE</i> (BALASHOV, 1953) | TUG 1393-44     | Vasalemma Quarry, reef 26 |
| <i>DISCOCERAS VASALEMMENSE</i> (BALASHOV, 1953) | TUG 1585-33     | Rummu Quarry, Rummu 1     |
| <i>DISCOCERAS VASALEMMENSE</i> (BALASHOV, 1953) | TUG 1585-61     | Rummu Quarry, Rummu 1     |
| <i>DISCOCERAS VASALEMMENSE</i> (BALASHOV, 1953) | TUG 1585-36     | Rummu Quarry, Rummu 1     |
| <i>DISCOCERAS VASALEMMENSE</i> (BALASHOV, 1953) | TUG 1585-40     | Rummu Quarry, Rummu 1     |
| <i>DISCOCERAS VASALEMMENSE</i> (BALASHOV, 1953) | GIT 222-668     | Vasalemma                 |
| <i>DISCOCERAS VASALEMMENSE</i> (BALASHOV, 1953) | GIT 222-536-1   | Vasalemma                 |
| <i>DISCOCERAS VASALEMMENSE</i> (BALASHOV, 1953) | GIT 222-93      | Vasalemma Quarry          |
| <i>DISCOCERAS VASALEMMENSE</i> (BALASHOV, 1953) | GIT 222-94      | Vasalemma Quarry          |
| <i>DISCOCERAS VASALEMMENSE</i> (BALASHOV, 1953) | GIT 222-92      | Vasalemma Quarry          |
| <i>DISCOCERAS VASALEMMENSE</i> (BALASHOV, 1953) | GIT 222-543     | Vasalemma Quarry          |
| <i>DISCOCERAS VASALEMMENSE</i> (BALASHOV, 1953) | GIT 222-544     | Vasalemma Quarry          |
| <i>DISCOCERAS VASALEMMENSE</i> (BALASHOV, 1953) | GIT 222-545-2   | Vasalemma Quarry          |
| <i>DISCOCERAS VASALEMMENSE</i> (BALASHOV, 1953) | GIT 222-98      | Vasalemma Quarry          |
| <i>DISCOCERAS VASALEMMENSE</i> (BALASHOV, 1953) | GIT 222-90      | Vasalemma Quarry          |
| <i>DISCOCERAS VASALEMMENSE</i> (BALASHOV, 1953) | GIT 222-96      | Vasalemma Quarry          |
| <i>DISCOCERAS VASALEMMENSE</i> (BALASHOV, 1953) | GIT 222-439     | Vasalemma Quarry          |
| <i>DISCOCERAS VASALEMMENSE</i> (BALASHOV, 1953) | GIT 222-589     | Vasalemma Quarry          |
| <i>DISCOCERAS VASALEMMENSE</i> (BALASHOV, 1953) | GIT 222-590     | Vasalemma Quarry          |
| total 39 specimens                              |                 |                           |
| <i>DISCOCERAS RAROSPIRA</i> (EICHWALD, 1860)    | GIT 222-95      | Vasalemma Quarry          |
| <i>DISCOCERAS RAROSPIRA</i> (EICHWALD, 1860)    | TUG 1585-34     | Rummu Quarry, Rummu 1     |
| total 2 specimens                               |                 |                           |
| <i>DISCOCERAS</i> sp.                           | GIT 222-571     | Vasalemma Quarry          |

|                                                |               |                            |
|------------------------------------------------|---------------|----------------------------|
| <i>DISCOCERAS</i> sp.                          | GIT 222-677-1 | Vasalemma                  |
| <i>DISCOCERAS</i> sp.                          | GIT 222-677-2 | Vasalemma                  |
| total 3 specimens                              |               |                            |
| <i>TROCHOLITES GENNADII</i> sp. nov.           | TUG 939-71    | Vasalemma                  |
| <i>TROCHOLITES GENNADII</i> sp. nov.           | GIT 222-669   | Vasalemma                  |
| total 2 specimens                              |               |                            |
| <i>CURTOCERAS ABDITUS</i> sp. nov.             | GIT 222-676   | Vasalemma                  |
| total 1 specimen                               |               |                            |
| <i>VASALEMMOCERAS TOLERABILE</i> STUMBUR, 1962 | GIT 426-134   | Vasalemma                  |
| <i>VASALEMMOCERAS TOLERABILE</i> STUMBUR, 1962 | GIT 426-132   | Vasalemma                  |
| <i>VASALEMMOCERAS TOLERABILE</i> STUMBUR, 1962 | GIT 426-130   | Vasalemma                  |
| <i>VASALEMMOCERAS TOLERABILE</i> STUMBUR, 1962 | GIT 426-133   | Vasalemma                  |
| <i>VASALEMMOCERAS TOLERABILE</i> STUMBUR, 1962 | GIT 426-135   | Vasalemma                  |
| <i>VASALEMMOCERAS TOLERABILE</i> STUMBUR, 1962 | GIT 426-129a  | Vasalemma                  |
| <i>VASALEMMOCERAS TOLERABILE</i> STUMBUR, 1962 | GIT 426-129b  | Vasalemma                  |
| <i>VASALEMMOCERAS TOLERABILE</i> STUMBUR, 1962 | GIT 426-131   | Vasalemma                  |
| <i>VASALEMMOCERAS TOLERABILE</i> STUMBUR, 1962 | TUG 1585-20a  | Rummu Quarry, Rummu 1      |
| <i>VASALEMMOCERAS TOLERABILE</i> STUMBUR, 1962 | GIT 147-4     | Vasalemma                  |
| <i>VASALEMMOCERAS TOLERABILE</i> STUMBUR, 1962 | GIT 222-91    | Vasalemma Quarry           |
| <i>VASALEMMOCERAS TOLERABILE</i> STUMBUR, 1962 | GIT 222-689   | Vasalemma Quarry           |
| <i>VASALEMMOCERAS TOLERABILE</i> STUMBUR, 1962 | GIT 147-5a    | Vasalemma                  |
| total 13 specimens                             |               |                            |
| <i>BARRANDEOCERID</i> indet                    | GIT 222-570   | Vasalemma Quarry           |
| total 1 specimen                               |               |                            |
| <i>HEMIBELOITOCERAS MOLIS</i> sp. nov.         | TUG 1585-32   | Rummu Quarry, Rummu 1      |
| <i>HEMIBELOITOCERAS MOLIS</i> sp. nov.         | TUG 1307-2a   | Vasalemma Quarry           |
| <i>HEMIBELOITOCERAS MOLIS</i> sp. nov.         | GIT 222-683   | Vasalemma                  |
| <i>HEMIBELOITOCERAS MOLIS</i> sp. nov.         | GIT 426-163   | Vasalemma Quarry           |
| <i>HEMIBELOITOCERAS MOLIS</i> sp. nov.         | GIT 426-164   | Vasalemma Quarry           |
| <i>HEMIBELOITOCERAS MOLIS</i> sp. nov.         | GIT 426-165   | Vasalemma Quarry           |
| <i>HEMIBELOITOCERAS MOLIS</i> sp. nov.         | GIT 426-166   | Vasalemma Quarry           |
| <i>HEMIBELOITOCERAS MOLIS</i> sp. nov.         | GIT 426-167   | Vasalemma Quarry           |
| total 8 specimens                              |               |                            |
| <i>HEMIBELOITOCERAS ARDUUM</i> sp. nov.        | TUG 1612-12   | Rummu Quarry, Rummu 2      |
| <i>HEMIBELOITOCERAS ARDUUM</i> sp. nov.        | TUG 1612-13   | Rummu Quarry, Rummu 2      |
| <i>HEMIBELOITOCERAS ARDUUM</i> sp. nov.        | TUG 1585-49   | Rummu Quarry, reef in Saku |
| total 3 specimens                              |               |                            |
| <i>HEMIBELOITOCERAS</i> sp.                    | TUG 1307-2b   | Vasalemma Quarry           |
| <i>HEMIBELOITOCERAS</i> sp.                    | TUG 1612-14   | Rummu                      |
| <i>HEMIBELOITOCERAS</i> sp.                    | GIT 222-671   | Vasalemma                  |
| total 3 specimens                              |               |                            |
| <i>ISORTHOCERAS MARIS</i> sp. nov.             | TUG 1307-26   | Vasalemma Quarry           |
| <i>ISORTHOCERAS MARIS</i> sp. nov.             | TUG 1393-16   | Vasalemma Quarry, reef 27  |
| total 2 specimens                              |               |                            |
| <i>ISORTHOCERAS PADISENSE</i> sp. nov.         | TUG 1585-18 B | Rummu Quarry, Rummu 1      |
| <i>ISORTHOCERAS PADISENSE</i> sp. nov.         | TUG 1709-5    | Rummu Quarry, Rummu 1      |
| total 2 specimens                              |               |                            |

|                                                               |               |                                                  |
|---------------------------------------------------------------|---------------|--------------------------------------------------|
| <i>ISORTHOCERAS CAVI</i> sp. nov.                             | TUG 1585-23   | Rummu Quarry, Rummu 1                            |
| <i>ISORTHOCERAS CAVI</i> sp. nov.                             | TUG 1393-45   | Vasalemma                                        |
| <i>ISORTHOCERAS CAVI</i> sp. nov.                             | TUG 1393-22   | Vasalemma Quarry, I reef 42                      |
| <i>ISORTHOCERAS CAVI</i> sp. nov.                             | TUG 1585-25   | Rummu Quarry, Rummu 1                            |
| <i>ISORTHOCERAS CAVI</i> sp. nov.                             | TUG 1307-5    | Vasalemma Quarry                                 |
| <i>ISORTHOCERAS CAVI</i> sp. nov.                             | TUG 1585-41   | Rummu Quarry, Rummu 1                            |
| <i>ISORTHOCERAS CAVI</i> sp. nov.                             | GIT 222-637   | Vasalemma Quarry                                 |
| <i>ISORTHOCERAS CAVI</i> sp. nov.                             | GIT 222-653   | Vasalemma Quarry                                 |
| <i>ISORTHOCERAS CAVI</i> sp. nov.                             | GIT 222-664   | Vasalemma Quarry                                 |
| total 9 specimens                                             |               |                                                  |
| <i>ISORTHOCERAS VEXILLI</i> sp. nov.                          | TUG 939-11    | Vasalemma                                        |
| <i>ISORTHOCERAS VEXILLI</i> sp. nov.                          | TUG 1585-18 C | Rummu Quarry, Rummu 1                            |
| <i>ISORTHOCERAS VEXILLI</i> sp. nov.                          | TUG 939-33    | Vasalemma                                        |
| total 3 specimens                                             |               |                                                  |
| <i>STRIATOCYCLOCERAS UNDULOSTRIATUM</i> KRÖGER & ISAKAR, 2006 | TUG 939-24    | Vasalemma                                        |
| <i>STRIATOCYCLOCERAS UNDULOSTRIATUM</i> KRÖGER & ISAKAR, 2006 | TUG 1393-15   | Vasalemma Quarry, reef 26                        |
| <i>STRIATOCYCLOCERAS UNDULOSTRIATUM</i> KRÖGER & ISAKAR, 2006 | TUG 1585-19   | Rummu 1, Saku                                    |
| <i>STRIATOCYCLOCERAS UNDULOSTRIATUM</i> KRÖGER & ISAKAR, 2006 | TUG 1307-4    | Vasalemma Quarry                                 |
| <i>STRIATOCYCLOCERAS UNDULOSTRIATUM</i> KRÖGER & ISAKAR, 2006 | TUG 1307-3 A  | Vasalemma Quarry                                 |
| <i>STRIATOCYCLOCERAS UNDULOSTRIATUM</i> KRÖGER & ISAKAR, 2006 | TUG 1307-3 B  | Vasalemma Quarry                                 |
| <i>STRIATOCYCLOCERAS UNDULOSTRIATUM</i> KRÖGER & ISAKAR, 2006 | TUG 1307-3 C  | Vasalemma Quarry                                 |
| <i>STRIATOCYCLOCERAS UNDULOSTRIATUM</i> KRÖGER & ISAKAR, 2006 | TUG 1307-3 D  | Vasalemma Quarry                                 |
| <i>STRIATOCYCLOCERAS UNDULOSTRIATUM</i> KRÖGER & ISAKAR, 2006 | TUG 1307-3 E  | Vasalemma Quarry                                 |
| <i>STRIATOCYCLOCERAS UNDULOSTRIATUM</i> KRÖGER & ISAKAR, 2006 | TUG 1585-62   | Rummu Quarry, Rummu 1                            |
| <i>STRIATOCYCLOCERAS UNDULOSTRIATUM</i> KRÖGER & ISAKAR, 2006 | TUG 1709-24   | Rummu Quarry, Rummu 1, loose blocks, reef facies |
| <i>STRIATOCYCLOCERAS UNDULOSTRIATUM</i> KRÖGER & ISAKAR, 2006 | TUG 1585-63   | Rummu Quarry, Rummu 1                            |
| <i>STRIATOCYCLOCERAS UNDULOSTRIATUM</i> KRÖGER & ISAKAR, 2006 | TUG 1709-25   | Rummu Quarry, Rummu 1                            |
| <i>STRIATOCYCLOCERAS UNDULOSTRIATUM</i> KRÖGER & ISAKAR, 2006 | TUG 1709-26   | Rummu Quarry, Rummu 1                            |
| <i>STRIATOCYCLOCERAS UNDULOSTRIATUM</i> KRÖGER & ISAKAR, 2006 | TUG 1709-27   | Rummu Quarry, Rummu 1, loose blocks, reef facies |
| <i>STRIATOCYCLOCERAS UNDULOSTRIATUM</i> KRÖGER & ISAKAR, 2006 | TUG 1709-28   | Rummu Quarry, Rummu 1, loose blocks, reef facies |
| <i>STRIATOCYCLOCERAS UNDULOSTRIATUM</i> KRÖGER & ISAKAR, 2006 | TUG 1709-29   | Rummu Quarry, Rummu 1                            |
| <i>STRIATOCYCLOCERAS UNDULOSTRIATUM</i> KRÖGER & ISAKAR, 2006 | TUG 1709-30   | Rummu Quarry, Rummu 1                            |
| <i>STRIATOCYCLOCERAS UNDULOSTRIATUM</i> KRÖGER & ISAKAR, 2006 | TUG 1585-64   | Rummu Quarry, Rummu 1                            |
| <i>STRIATOCYCLOCERAS UNDULOSTRIATUM</i> KRÖGER & ISAKAR, 2006 | TUG 1585-63   | Rummu Quarry, Rummu 1                            |

|                                                               |               |                       |
|---------------------------------------------------------------|---------------|-----------------------|
| <i>STRIATOCYCLOCERAS UNDULOSTRIATUM</i> KRÖGER & ISAKAR, 2006 | TUG 1585-62   | Rummu Quarry, Rummu 1 |
| <i>STRIATOCYCLOCERAS UNDULOSTRIATUM</i> KRÖGER & ISAKAR, 2006 | TUG 1585-61   | Rummu Quarry, Rummu 1 |
| <i>STRIATOCYCLOCERAS UNDULOSTRIATUM</i> KRÖGER & ISAKAR, 2006 | GIT 222-599   | Vasalemma Quarry      |
| <i>STRIATOCYCLOCERAS UNDULOSTRIATUM</i> KRÖGER & ISAKAR, 2006 | GIT 222-598   | Vasalemma Quarry      |
| <i>STRIATOCYCLOCERAS UNDULOSTRIATUM</i> KRÖGER & ISAKAR, 2006 | GIT 222-597   | Vasalemma Quarry      |
| <i>STRIATOCYCLOCERAS UNDULOSTRIATUM</i> KRÖGER & ISAKAR, 2006 | GIT 222-596   | Vasalemma Quarry      |
| <i>STRIATOCYCLOCERAS UNDULOSTRIATUM</i> KRÖGER & ISAKAR, 2006 | GIT 222-595   | Vasalemma Quarry      |
| <i>STRIATOCYCLOCERAS UNDULOSTRIATUM</i> KRÖGER & ISAKAR, 2006 | GIT 222-594   | Vasalemma Quarry      |
| <i>STRIATOCYCLOCERAS UNDULOSTRIATUM</i> KRÖGER & ISAKAR, 2006 | GIT 222-593   | Vasalemma Quarry      |
| <i>STRIATOCYCLOCERAS UNDULOSTRIATUM</i> KRÖGER & ISAKAR, 2006 | GIT 222-592   | Vasalemma Quarry      |
| <i>STRIATOCYCLOCERAS UNDULOSTRIATUM</i> KRÖGER & ISAKAR, 2006 | GIT 222-591   | Vasalemma Quarry      |
| <i>STRIATOCYCLOCERAS UNDULOSTRIATUM</i> KRÖGER & ISAKAR, 2006 | GIT 222-686   | Vasalemma             |
| <i>STRIATOCYCLOCERAS UNDULOSTRIATUM</i> KRÖGER & ISAKAR, 2006 | GIT 222-438-1 | Vasalemma Quarry      |
| <i>STRIATOCYCLOCERAS UNDULOSTRIATUM</i> KRÖGER & ISAKAR, 2006 | GIT 222-554   | Vasalemma Quarry      |
| <i>STRIATOCYCLOCERAS UNDULOSTRIATUM</i> KRÖGER & ISAKAR, 2006 | GIT 222-666   | Vasalemma Quarry      |
| <i>STRIATOCYCLOCERAS UNDULOSTRIATUM</i> KRÖGER & ISAKAR, 2006 | GIT 222-97    | Vasalemma Quarry      |
| <i>STRIATOCYCLOCERAS UNDULOSTRIATUM</i> KRÖGER & ISAKAR, 2006 | GIT 222-600-1 | Vasalemma Quarry      |
| <i>STRIATOCYCLOCERAS UNDULOSTRIATUM</i> KRÖGER & ISAKAR, 2006 | GIT 222-600-2 | Vasalemma Quarry      |
| <i>STRIATOCYCLOCERAS UNDULOSTRIATUM</i> KRÖGER & ISAKAR, 2006 | GIT 222-609   | Vasalemma Quarry      |
| <i>STRIATOCYCLOCERAS UNDULOSTRIATUM</i> KRÖGER & ISAKAR, 2006 | GIT 222-608   | Vasalemma Quarry      |
| <i>STRIATOCYCLOCERAS UNDULOSTRIATUM</i> KRÖGER & ISAKAR, 2006 | GIT 222-607   | Vasalemma Quarry      |
| <i>STRIATOCYCLOCERAS UNDULOSTRIATUM</i> KRÖGER & ISAKAR, 2006 | GIT 222-606   | Vasalemma Quarry      |
| <i>STRIATOCYCLOCERAS UNDULOSTRIATUM</i> KRÖGER & ISAKAR, 2006 | GIT 222-605   | Vasalemma Quarry      |
| <i>STRIATOCYCLOCERAS UNDULOSTRIATUM</i> KRÖGER & ISAKAR, 2006 | GIT 222-604   | Vasalemma Quarry      |
| <i>STRIATOCYCLOCERAS UNDULOSTRIATUM</i> KRÖGER & ISAKAR, 2006 | GIT 222-603   | Vasalemma Quarry      |
| <i>STRIATOCYCLOCERAS UNDULOSTRIATUM</i> KRÖGER & ISAKAR, 2006 | GIT 222-602   | Vasalemma Quarry      |
| <i>STRIATOCYCLOCERAS UNDULOSTRIATUM</i> KRÖGER & ISAKAR, 2006 | GIT 222-601   | Vasalemma Quarry      |
| total 51 specimens                                            |               |                       |
| <i>RUMMOCERAS RUMMUENSIS</i> gen. et sp. nov.                 | TUG 1709-31   | Rummu Quarry, Rummu 1 |
| total 1 specimen                                              |               |                       |

|                                                        |               |                                            |
|--------------------------------------------------------|---------------|--------------------------------------------|
| <i>PLEURORTHOCERAS ORGANI</i> sp. nov.                 | TUG 1307-27   | Vasalemma Quarry                           |
| <i>PLEURORTHOCERAS ORGANI</i> sp. nov.                 | TUG 939-84a   | Vasalemma                                  |
| <i>PLEURORTHOCERAS ORGANI</i> sp. nov.                 | TUG 939-84b   | Vasalemma                                  |
| <i>PLEURORTHOCERAS ORGANI</i> sp. nov.                 | TUG 939-84c   | Vasalemma                                  |
| <i>PLEURORTHOCERAS ORGANI</i> sp. nov.                 | GIT 222-536-2 | Vasalemma                                  |
| total 5 specimens                                      |               |                                            |
| <i>ORDOGEISONOCERAS?</i> sp.                           | TUG 939-8     | Vasalemma                                  |
| <i>ORDOGEISONOCERAS?</i> sp.                           | TUG 939-9a    | Vasalemma                                  |
| total 2 specimens                                      |               |                                            |
| <i>ORDOGEISONOCERAS TARTUENSIS</i> sp. nov.            | TUG 939-10    | Vasalemma                                  |
| <i>ORDOGEISONOCERAS TARTUENSIS</i> sp. nov.            | TUG 939-1065a | Vasalemma                                  |
| <i>ORDOGEISONOCERAS TARTUENSIS</i> sp. nov.            | TUG 939-1065b | Vasalemma                                  |
| <i>ORDOGEISONOCERAS TARTUENSIS</i> sp. nov.            | TUG 939-1065c | Vasalemma                                  |
| <i>ORDOGEISONOCERAS TARTUENSIS</i> sp. nov.            | TUG 939-1065d | Vasalemma                                  |
| <i>ORDOGEISONOCERAS TARTUENSIS</i> sp. nov.            | TUG 939-1065e | Vasalemma                                  |
| <i>ORDOGEISONOCERAS TARTUENSIS</i> sp. nov.            | GIT 222-667   | Vasalemma Quarry                           |
| total 7 specimens                                      |               |                                            |
| <i>ORTHONYBYOCERAS</i> cf. <i>DYERI</i> (miller, 1875) | TUG 1307-1    | Vasalemma Quarry                           |
| <i>ORTHONYBYOCERAS</i> cf. <i>DYERI</i> (miller, 1875) | TUG 1709-32   | Rummu Quarry, Rummu 1                      |
| <i>ORTHONYBYOCERAS</i> cf. <i>DYERI</i> (miller, 1875) | TUG 939-35    | Vasalemma                                  |
| <i>ORTHONYBYOCERAS</i> cf. <i>DYERI</i> (miller, 1875) | TUG 1709-33   | Rummu Quarry, Rummu 1                      |
| <i>ORTHONYBYOCERAS</i> cf. <i>DYERI</i> (miller, 1875) | TUG 939-36    | Rummu Quarry, Rummu 1                      |
| <i>ORTHONYBYOCERAS</i> cf. <i>DYERI</i> (miller, 1875) | TUG 1307-6    | Vasalemma Quarry                           |
| <i>ORTHONYBYOCERAS</i> cf. <i>DYERI</i> (miller, 1875) | TUG 1393-46   | Vasalemma Quarry, reef 42                  |
| <i>ORTHONYBYOCERAS</i> cf. <i>DYERI</i> (miller, 1875) | TUG 1393-47   | Vasalemma Quarry, reef 42                  |
| <i>ORTHONYBYOCERAS</i> cf. <i>DYERI</i> (miller, 1875) | TUG 1709-34   | Rummu Quarry, Rummu 1                      |
| <i>ORTHONYBYOCERAS</i> cf. <i>DYERI</i> (miller, 1875) | TUG 1585-18a  | Rummu Quarry, Saku                         |
| <i>ORTHONYBYOCERAS</i> cf. <i>DYERI</i> (miller, 1875) | TUG 939-42    | Vasalemma                                  |
| <i>ORTHONYBYOCERAS</i> cf. <i>DYERI</i> (miller, 1875) | TUG 939-83    | Vasalemma                                  |
| <i>ORTHONYBYOCERAS</i> cf. <i>DYERI</i> (miller, 1875) | TUG 1709-3a   | Rummu Quarry, Rummu 1                      |
| <i>ORTHONYBYOCERAS</i> cf. <i>DYERI</i> (miller, 1875) | TUG 1709-3b   | Rummu Quarry, Rummu 1                      |
| <i>ORTHONYBYOCERAS</i> cf. <i>DYERI</i> (miller, 1875) | TUG 100-6a    | Vasalemma                                  |
| <i>ORTHONYBYOCERAS</i> cf. <i>DYERI</i> (miller, 1875) | TUG 100-6b    | Vasalemma                                  |
| <i>ORTHONYBYOCERAS</i> cf. <i>DYERI</i> (miller, 1875) | TUG 939-31    | Vasalemma                                  |
| <i>ORTHONYBYOCERAS</i> cf. <i>DYERI</i> (miller, 1875) | TUG 939-39    | Vasalemma                                  |
| <i>ORTHONYBYOCERAS</i> cf. <i>DYERI</i> (miller, 1875) | TUG 939-43    | Vasalemma                                  |
| <i>ORTHONYBYOCERAS</i> cf. <i>DYERI</i> (miller, 1875) | TUG 939-46    | Vasalemma                                  |
| <i>ORTHONYBYOCERAS</i> cf. <i>DYERI</i> (miller, 1875) | TUG 1709-35   | Rummu Quarry, Rummu 1                      |
| <i>ORTHONYBYOCERAS</i> cf. <i>DYERI</i> (miller, 1875) | TUG 939-40    | Vasalemma                                  |
| <i>ORTHONYBYOCERAS</i> cf. <i>DYERI</i> (miller, 1875) | TUG 1709-20   | Rummu Quarry, Rummu 1                      |
| <i>ORTHONYBYOCERAS</i> cf. <i>DYERI</i> (miller, 1875) | TUG 1307-6    | Vasalemma quarry                           |
| <i>ORTHONYBYOCERAS</i> cf. <i>DYERI</i> (miller, 1875) | TUG 1393-34   | Vasalemma Quarry, reef 42, cephalopod cave |
| <i>ORTHONYBYOCERAS</i> cf. <i>DYERI</i> (miller, 1875) | TUG 1307-31   | Vasalemma Quarry                           |
| <i>ORTHONYBYOCERAS</i> cf. <i>DYERI</i> (miller, 1875) | TUG 1393-30   | Vasalemma Quarry, reef 42, cephalopod cave |
| <i>ORTHONYBYOCERAS</i> cf. <i>DYERI</i> (miller, 1875) | TUG 1709-18a  | Rummu Quarry, Rummu 1                      |
| <i>ORTHONYBYOCERAS</i> cf. <i>DYERI</i> (miller, 1875) | TUG 1709-18b  | Rummu Quarry, Rummu 1                      |

|                                                 |               |                                            |
|-------------------------------------------------|---------------|--------------------------------------------|
| ORTHONYBYOCERAS cf. <i>DYERI</i> (miller, 1875) | TUG 1709-18c  | Rummu Quarry, Rummu 1                      |
| ORTHONYBYOCERAS cf. <i>DYERI</i> (miller, 1875) | TUG 1709-21   | Rummu Quarry, Rummu 1                      |
| ORTHONYBYOCERAS cf. <i>DYERI</i> (miller, 1875) | TUG 1585-44   | Rummu Quarry, Rummu 1                      |
| ORTHONYBYOCERAS cf. <i>DYERI</i> (miller, 1875) | TUG 1585-48a  | Rummu 1, Saku fissure in reef              |
| ORTHONYBYOCERAS cf. <i>DYERI</i> (miller, 1875) | TUG1585-48b   | Rummu 1, Saku fissure in reef              |
| ORTHONYBYOCERAS cf. <i>DYERI</i> (miller, 1875) | TUG 1585-48c  | Rummu 1, Saku fissure in reef              |
| ORTHONYBYOCERAS cf. <i>DYERI</i> (miller, 1875) | TUG 1585-47   | Rummu Quarry, Rummu 1                      |
| ORTHONYBYOCERAS cf. <i>DYERI</i> (miller, 1875) | TUG1393-31    | Vasalemma Quarry, reef 42, cephalopod cave |
| ORTHONYBYOCERAS cf. <i>DYERI</i> (miller, 1875) | TUG 1644-56b  | Vasalemma                                  |
| ORTHONYBYOCERAS cf. <i>DYERI</i> (miller, 1875) | TUG 1644-56c  | Vasalemma                                  |
| ORTHONYBYOCERAS cf. <i>DYERI</i> (miller, 1875) | TUG 1644-56d  | Vasalemma                                  |
| ORTHONYBYOCERAS cf. <i>DYERI</i> (miller, 1875) | TUG 1585-46   | Rummu Quarry, Rummu 1, Saku reef           |
| ORTHONYBYOCERAS cf. <i>DYERI</i> (miller, 1875) | TUG 1709-17a  | Rummu Quarry, Rummu 1, reef facies         |
| ORTHONYBYOCERAS cf. <i>DYERI</i> (miller, 1875) | TUG 1709-17b  | Rummu Quarry, Rummu 1, reef facies         |
| ORTHONYBYOCERAS cf. <i>DYERI</i> (miller, 1875) | TUG 1393-33   | Vasalemma Quarry, reef 42, cephalopod cave |
| ORTHONYBYOCERAS cf. <i>DYERI</i> (miller, 1875) | TUG 1585-43   | Rummu Quarry, Rummu 1                      |
| ORTHONYBYOCERAS cf. <i>DYERI</i> (miller, 1875) | TUG 1709-19   | Rummu Quarry, Rummu 1                      |
| ORTHONYBYOCERAS cf. <i>DYERI</i> (miller, 1875) | TUG 1585-45   | Rummu Quarry, Rummu 1                      |
| ORTHONYBYOCERAS cf. <i>DYERI</i> (miller, 1875) | TUG 1393-36   | Vasalemma Quarry, reef 42, cephalopod cave |
| ORTHONYBYOCERAS cf. <i>DYERI</i> (miller, 1875) | TUG 1393-28   | Vasalemma Quarry, reef 27                  |
| ORTHONYBYOCERAS cf. <i>DYERI</i> (miller, 1875) | TUG 1393-29   | Vasalemma Quarry, reef 42, cephalopod cave |
| ORTHONYBYOCERAS cf. <i>DYERI</i> (miller, 1875) | TUG 1709-16   | Rummu Quarry, Rummu 1                      |
| ORTHONYBYOCERAS cf. <i>DYERI</i> (miller, 1875) | GIT 222-652-1 | Vasalemma Quarry                           |
| ORTHONYBYOCERAS cf. <i>DYERI</i> (miller, 1875) | GIT 222-652-2 | Vasalemma Quarry                           |
| ORTHONYBYOCERAS cf. <i>DYERI</i> (miller, 1875) | GIT 222-672   | Vasalemma                                  |
| ORTHONYBYOCERAS cf. <i>DYERI</i> (miller, 1875) | GIT 222-673   | Vasalemma                                  |
| ORTHONYBYOCERAS cf. <i>DYERI</i> (miller, 1875) | GIT 222-694   | Vasalemma                                  |
| ORTHONYBYOCERAS cf. <i>DYERI</i> (miller, 1875) | GIT 222-693   | Vasalemma                                  |
| ORTHONYBYOCERAS cf. <i>DYERI</i> (miller, 1875) | GIT 222-692   | Vasalemma                                  |
| ORTHONYBYOCERAS cf. <i>DYERI</i> (miller, 1875) | GIT 222-691   | Vasalemma                                  |
| ORTHONYBYOCERAS cf. <i>DYERI</i> (miller, 1875) | GIT 222-690   | Vasalemma                                  |
| ORTHONYBYOCERAS cf. <i>DYERI</i> (miller, 1875) | GIT 222-674   | Vasalemma                                  |
| ORTHONYBYOCERAS cf. <i>DYERI</i> (miller, 1875) | GIT 222-675   | Vasalemma                                  |
| ORTHONYBYOCERAS cf. <i>DYERI</i> (miller, 1875) | GIT 222-636   | Vasalemma Quarry                           |
| ORTHONYBYOCERAS cf. <i>DYERI</i> (miller, 1875) | GIT 222-635   | Vasalemma Quarry                           |
| ORTHONYBYOCERAS cf. <i>DYERI</i> (miller, 1875) | GIT 222-634   | Vasalemma Quarry                           |
| ORTHONYBYOCERAS cf. <i>DYERI</i> (miller, 1875) | GIT 222-633   | Vasalemma Quarry                           |
| ORTHONYBYOCERAS cf. <i>DYERI</i> (miller, 1875) | GIT 222-617   | Vasalemma Quarry                           |
| ORTHONYBYOCERAS cf. <i>DYERI</i> (miller, 1875) | GIT 222-616   | Vasalemma Quarry                           |
| ORTHONYBYOCERAS cf. <i>DYERI</i> (miller, 1875) | GIT 222-615   | Vasalemma Quarry                           |
| ORTHONYBYOCERAS cf. <i>DYERI</i> (miller, 1875) | GIT 222-649   | Vasalemma Quarry                           |
| ORTHONYBYOCERAS cf. <i>DYERI</i> (miller, 1875) | GIT 222-648   | Vasalemma Quarry                           |
| ORTHONYBYOCERAS cf. <i>DYERI</i> (miller, 1875) | GIT 222-647   | Vasalemma Quarry                           |

|                                                 |               |                           |
|-------------------------------------------------|---------------|---------------------------|
| ORTHONYBYOCERAS cf. <i>DYERI</i> (miller, 1875) | GIT 222-646   | Vasalemma Quarry          |
| ORTHONYBYOCERAS cf. <i>DYERI</i> (miller, 1875) | GIT 222-645   | Vasalemma Quarry          |
| ORTHONYBYOCERAS cf. <i>DYERI</i> (miller, 1875) | GIT 222-644   | Vasalemma Quarry          |
| ORTHONYBYOCERAS cf. <i>DYERI</i> (miller, 1875) | GIT 222-643   | Vasalemma Quarry          |
| ORTHONYBYOCERAS cf. <i>DYERI</i> (miller, 1875) | GIT 222-642   | Vasalemma Quarry          |
| ORTHONYBYOCERAS cf. <i>DYERI</i> (miller, 1875) | GIT 222-641   | Vasalemma Quarry          |
| ORTHONYBYOCERAS cf. <i>DYERI</i> (miller, 1875) | GIT 222-640   | Vasalemma Quarry          |
| ORTHONYBYOCERAS cf. <i>DYERI</i> (miller, 1875) | GIT 222-639   | Vasalemma Quarry          |
| ORTHONYBYOCERAS cf. <i>DYERI</i> (miller, 1875) | GIT 222-638   | Vasalemma Quarry          |
| ORTHONYBYOCERAS cf. <i>DYERI</i> (miller, 1875) | GIT 222-650   | Vasalemma Quarry          |
| ORTHONYBYOCERAS cf. <i>DYERI</i> (miller, 1875) | GIT 222-580   | Vasalemma Quarry          |
| ORTHONYBYOCERAS cf. <i>DYERI</i> (miller, 1875) | GIT 222-584-5 | Vasalemma Quarry          |
| ORTHONYBYOCERAS cf. <i>DYERI</i> (miller, 1875) | GIT 222-586-1 | Vasalemma Quarry          |
| ORTHONYBYOCERAS cf. <i>DYERI</i> (miller, 1875) | GIT 222-586-2 | Vasalemma Quarry          |
| ORTHONYBYOCERAS cf. <i>DYERI</i> (miller, 1875) | GIT 222-630   | Vasalemma Quarry          |
| ORTHONYBYOCERAS cf. <i>DYERI</i> (miller, 1875) | GIT 222-631   | Vasalemma Quarry          |
| ORTHONYBYOCERAS cf. <i>DYERI</i> (miller, 1875) | GIT 222-632   | Vasalemma Quarry          |
| ORTHONYBYOCERAS cf. <i>DYERI</i> (miller, 1875) | GIT 222-665   | Vasalemma Quarry          |
| ORTHONYBYOCERAS cf. <i>DYERI</i> (miller, 1875) | GIT 222-577   | Vasalemma Quarry          |
| ORTHONYBYOCERAS cf. <i>DYERI</i> (miller, 1875) | GIT 222-676   | Vasalemma Quarry          |
| ORTHONYBYOCERAS cf. <i>DYERI</i> (miller, 1875) | GIT 222-677   | Vasalemma Quarry          |
| ORTHONYBYOCERAS cf. <i>DYERI</i> (miller, 1875) | GIT 222-547   | Vasalemma Quarry          |
| ORTHONYBYOCERAS cf. <i>DYERI</i> (miller, 1875) | GIT 222-682   | Vasalemma                 |
| ORTHONYBYOCERAS cf. <i>DYERI</i> (miller, 1875) | GIT 222-681   | Vasalemma                 |
| ORTHONYBYOCERAS cf. <i>DYERI</i> (miller, 1875) | GIT 222-680   | Vasalemma                 |
| ORTHONYBYOCERAS cf. <i>DYERI</i> (miller, 1875) | GIT 222-679   | Vasalemma                 |
| ORTHONYBYOCERAS cf. <i>DYERI</i> (miller, 1875) | GIT 222-57    | Vasalemma Quarry          |
| total 99 specimens                              |               |                           |
| ORTHONYBYOCERAS <i>ISAKARI</i> sp. nov.         | TUG 1393-48   | Vasalemma Quarry, reef 42 |
| ORTHONYBYOCERAS <i>ISAKARI</i> sp. nov.         | TUG 939-1180a | Vasalemma                 |
| ORTHONYBYOCERAS <i>ISAKARI</i> sp. nov.         | TUG 1709-36   | Rummu Quarry, Rummu 1     |
| ORTHONYBYOCERAS <i>ISAKARI</i> sp. nov.         | TUG 1307-32   | Vasalemma                 |
| ORTHONYBYOCERAS <i>ISAKARI</i> sp. nov.         | TUG 1585-68   | Rummu Quarry, Rummu 1     |
| ORTHONYBYOCERAS <i>ISAKARI</i> sp. nov.         | TUG 1393-19   | Vasalemma Quarry, reef 42 |
| ORTHONYBYOCERAS <i>ISAKARI</i> sp. nov.         | TUG 100-7     | Vasalemma                 |
| ORTHONYBYOCERAS <i>ISAKARI</i> sp. nov.         | TUG 100-8a    | Vasalemma                 |
| ORTHONYBYOCERAS <i>ISAKARI</i> sp. nov.         | TUG 100-8b    | Vasalemma                 |
| ORTHONYBYOCERAS <i>ISAKARI</i> sp. nov.         | TUG 1393-21   | Vasalemma Quarry, reef 42 |
| ORTHONYBYOCERAS <i>ISAKARI</i> sp. nov.         | TUG 1307-33   | Vasalemma                 |
| ORTHONYBYOCERAS <i>ISAKARI</i> sp. nov.         | TUG 939-38    | Vasalemma                 |
| ORTHONYBYOCERAS <i>ISAKARI</i> sp. nov.         | TUG 1585-21   | Rummu Quarry, Rummu 1     |
| ORTHONYBYOCERAS <i>ISAKARI</i> sp. nov.         | TUG 939-45    | Vasalemma                 |
| ORTHONYBYOCERAS <i>ISAKARI</i> sp. nov.         | TUG 1709-37   | Rummu Quarry, Rummu 1     |
| ORTHONYBYOCERAS <i>ISAKARI</i> sp. nov.         | TUG 1585-22   | Rummu Quarry, Rummu 1     |
| ORTHONYBYOCERAS <i>ISAKARI</i> sp. nov.         | TUG 1709-38   | Rummu Quarry, Rummu 1     |
| ORTHONYBYOCERAS <i>ISAKARI</i> sp. nov.         | TUG 1709-39   | Rummu Quarry, Rummu 1     |
| ORTHONYBYOCERAS <i>ISAKARI</i> sp. nov.         | TUG 1585-24   | Rummu Quarry, Rummu 1     |

|                                         |               |                                            |
|-----------------------------------------|---------------|--------------------------------------------|
| <i>ORTHONYBYOCERAS ISAKARI</i> sp. nov. | TUG 1709-4    | Rummu Quarry, Rummu 1                      |
| <i>ORTHONYBYOCERAS ISAKARI</i> sp. nov. | TUG 939-37    | Vasalemma                                  |
| <i>ORTHONYBYOCERAS ISAKARI</i> sp. nov. | TUG 1585-26a  | Rummu Quarry, Rummu 1                      |
| <i>ORTHONYBYOCERAS ISAKARI</i> sp. nov. | TUG 1585-26b  | Rummu Quarry, Rummu 1                      |
| <i>ORTHONYBYOCERAS ISAKARI</i> sp. nov. | TUG 1585-26c  | Rummu Quarry, Rummu 1                      |
| <i>ORTHONYBYOCERAS ISAKARI</i> sp. nov. | TUG 1709-23   | Rummu Quarry, Rummu 1                      |
| <i>ORTHONYBYOCERAS ISAKARI</i> sp. nov. | TUG 1589-50   | Rummu Quarry, Rummu 1                      |
| <i>ORTHONYBYOCERAS ISAKARI</i> sp. nov. | TUG 1585-52   | Rummu Quarry, Rummu 1                      |
| <i>ORTHONYBYOCERAS ISAKARI</i> sp. nov. | TUG 1393-40   | Vasalemma Quarry, reef 42, cephalopod cave |
| <i>ORTHONYBYOCERAS ISAKARI</i> sp. nov. | TUG 1393-38   | Vasalemma Quarry, reef 42, cephalopod cave |
| <i>ORTHONYBYOCERAS ISAKARI</i> sp. nov. | TUG 1393-32   | Vasalemma Quarry, reef 42, cephalopod cave |
| <i>ORTHONYBYOCERAS ISAKARI</i> sp. nov. | TUG 1585-51   | Rummu Quarry, Rummu 1                      |
| <i>ORTHONYBYOCERAS ISAKARI</i> sp. nov. | TUG 1393-41   | Vasalemma Quarry, reef 42, cephalopod cave |
| <i>ORTHONYBYOCERAS ISAKARI</i> sp. nov. | TUG 1393-37   | Vasalemma Quarry, reef 42, cephalopod cave |
| <i>ORTHONYBYOCERAS ISAKARI</i> sp. nov. | TUG 1585-59-1 |                                            |
| <i>ORTHONYBYOCERAS ISAKARI</i> sp. nov. | TUG 1585-59-2 |                                            |
| <i>ORTHONYBYOCERAS ISAKARI</i> sp. nov. | TUG 1585-57   | Rummu Quarry, Rummu 1                      |
| <i>ORTHONYBYOCERAS ISAKARI</i> sp. nov. | TUG 1585-60   | Rummu Quarry, Rummu 1, reef in Saku        |
| <i>ORTHONYBYOCERAS ISAKARI</i> sp. nov. | TUG 1393-39   | Vasalemma Quarry, reef 42, cephalopod cave |
| <i>ORTHONYBYOCERAS ISAKARI</i> sp. nov. | TUG 1709-22   | Rummu Quarry, Rummu 1                      |
| <i>ORTHONYBYOCERAS ISAKARI</i> sp. nov. | TUG 1585-53   | Rummu Quarry, Rummu 1, reef in Saku        |
| <i>ORTHONYBYOCERAS ISAKARI</i> sp. nov. | TUG 1585-58   | Rummu Quarry, Rummu 1, reef in Saku        |
| <i>ORTHONYBYOCERAS ISAKARI</i> sp. nov. | TUG 1585-54   | Rummu Quarry, Rummu 1                      |
| <i>ORTHONYBYOCERAS ISAKARI</i> sp. nov. | TUG 1585-56   | Rummu Quarry, Rummu 1                      |
| <i>ORTHONYBYOCERAS ISAKARI</i> sp. nov. | TUG 1585-55   | Rummu Quarry, Rummu 1                      |
| <i>ORTHONYBYOCERAS ISAKARI</i> sp. nov. | TUG 1644-56   | Rummu Quarry, flank of reef                |
| <i>ORTHONYBYOCERAS ISAKARI</i> sp. nov. | TUG 1393-35   | Vasalemma Quarry, reef 42, cephalopod cave |
| <i>ORTHONYBYOCERAS ISAKARI</i> sp. nov. | GIT 222-613   | Vasalemma Quarry                           |
| <i>ORTHONYBYOCERAS ISAKARI</i> sp. nov. | GIT 222-550   | Vasalemma Quarry                           |
| <i>ORTHONYBYOCERAS ISAKARI</i> sp. nov. | GIT 222-657   | Vasalemma Quarry                           |
| <i>ORTHONYBYOCERAS ISAKARI</i> sp. nov. | GIT 222-678   | Vasalemma                                  |
| <i>ORTHONYBYOCERAS ISAKARI</i> sp. nov. | GIT 222-641   | Vasalemma Quarry                           |
| <i>ORTHONYBYOCERAS ISAKARI</i> sp. nov. | GIT 222-660   | Vasalemma Quarry                           |
| <i>ORTHONYBYOCERAS ISAKARI</i> sp. nov. | GIT 222-659   | Vasalemma Quarry                           |
| <i>ORTHONYBYOCERAS ISAKARI</i> sp. nov. | GIT 222-662   | Vasalemma Quarry                           |
| <i>ORTHONYBYOCERAS ISAKARI</i> sp. nov. | GIT 222-582   | Vasalemma Quarry                           |
| <i>ORTHONYBYOCERAS ISAKARI</i> sp. nov. | GIT 222-583   | Vasalemma Quarry                           |
| <i>ORTHONYBYOCERAS ISAKARI</i> sp. nov. | GIT 222-619   | Vasalemma Quarry                           |
| <i>ORTHONYBYOCERAS ISAKARI</i> sp. nov. | GIT 222-620   | Vasalemma Quarry                           |
| <i>ORTHONYBYOCERAS ISAKARI</i> sp. nov. | GIT 222-612   | Vasalemma Quarry                           |



|                                          |               |                                               |
|------------------------------------------|---------------|-----------------------------------------------|
| <i>ORTHONYBYOCERAS ISAKARI</i> sp. nov.  | GIT 222-572   | Vasalemma Quarry                              |
| <i>ORTHONYBYOCERAS ISAKARI</i> sp. nov.  | GIT 222-687   | Vasalemma                                     |
| <i>ORTHONYBYOCERAS ISAKARI</i> sp. nov.  | GIT 222-688   | Vasalemma                                     |
| <i>ORTHONYBYOCERAS ISAKARI</i> sp. nov.  | GIT 222-573   | Vasalemma Quarry                              |
| <i>ORTHONYBYOCERAS ISAKARI</i> sp. nov.  | GIT 222-684   | Vasalemma                                     |
| <i>ORTHONYBYOCERAS ISAKARI</i> sp. nov.  | GIT 222-610   | Vasalemma                                     |
| total 65 specimens                       |               |                                               |
| <i>ORTHONYBYOCERAS MOISENSE</i> sp. nov. | TUG 1393-49   | Vasalemma Quarry, reef 42                     |
| <i>ORTHONYBYOCERAS MOISENSE</i> sp. nov. | TUG 939-44    | Vasalemma                                     |
| <i>ORTHONYBYOCERAS MOISENSE</i> sp. nov. | TUG 1393-26   | Vasalemma Quarry, reef 27,<br>cephalopod cave |
| <i>ORTHONYBYOCERAS MOISENSE</i> sp. nov. | TUG 1585-42   | Rummu Quarry, Rummu 1                         |
| <i>ORTHONYBYOCERAS MOISENSE</i> sp. nov. | TUG 1393-27   | Vasalemma Quarry, reef 27,<br>cephalopod cave |
| <i>ORTHONYBYOCERAS MOISENSE</i> sp. nov. | GIT 222-658   | Vasalemma Quarry                              |
| <i>ORTHONYBYOCERAS MOISENSE</i> sp. nov. | GIT 222-569   | Vasalemma Quarry                              |
| total 7 specimens                        |               |                                               |
| <i>ORTHONYBYOCERAS</i> sp.               | TUG 939-41    | Vasalemma                                     |
| <i>ORTHONYBYOCERAS</i> sp.               | TUG 939-1180b | Vasalemma                                     |
| <i>ORTHONYBYOCERAS</i> sp.               | TUG 939-1180c | Vasalemma                                     |
| <i>ORTHONYBYOCERAS</i> sp.               | TUG 939-1180d | Vasalemma                                     |
| <i>ORTHONYBYOCERAS</i> sp.               | GIT 222-542   | Vasalemma                                     |
| <i>ORTHONYBYOCERAS</i> sp.               | GIT 222-629   | Vasalemma Quarry                              |
| <i>ORTHONYBYOCERAS</i> sp.               | GIT 222-628   | Vasalemma Quarry                              |
| <i>ORTHONYBYOCERAS</i> sp.               | GIT 222-627   | Vasalemma Quarry                              |
| <i>ORTHONYBYOCERAS</i> sp.               | GIT 222-549   | Vasalemma Quarry                              |
| <i>ORTHONYBYOCERAS</i> sp.               | GIT 222-548   | Vasalemma Quarry                              |
| <i>ORTHONYBYOCERAS</i> sp.               | GIT 222-642   | Vasalemma Quarry                              |
| <i>ORTHONYBYOCERAS</i> sp.               | GIT 222-656   | Vasalemma Quarry                              |
| <i>ORTHONYBYOCERAS</i> sp.               | GIT 222-655   | Vasalemma Quarry                              |
| <i>ORTHONYBYOCERAS</i> sp.               | GIT 222-654   | Vasalemma Quarry                              |
| <i>ORTHONYBYOCERAS</i> sp.               | GIT 222-623   | Vasalemma Quarry                              |
| <i>ORTHONYBYOCERAS</i> sp.               | GIT 222-622   | Vasalemma Quarry                              |
| <i>ORTHONYBYOCERAS</i> sp.               | GIT 222-621   | Vasalemma Quarry                              |
| <i>ORTHONYBYOCERAS</i> sp.               | GIT 222-575   | Vasalemma Quarry                              |
| <i>ORTHONYBYOCERAS</i> sp.               | GIT 222-576   | Vasalemma Quarry                              |
| <i>ORTHONYBYOCERAS</i> sp.               | GIT 222-618   | Vasalemma Quarry                              |
| <i>ORTHONYBYOCERAS</i> sp.               | GIT 222-611   | Vasalemma Quarry                              |
| <i>ORTHONYBYOCERAS</i> sp.               | GIT 222-581   | Vasalemma Quarry                              |
| total 22 specimens                       |               |                                               |
| <i>HOELOCERAS MURONI</i> sp. nov.        | TUG 1709-6    | Rummu Quarry, Rummu 1                         |
| total 1 specimen                         |               |                                               |
| <i>BELOITOCERAS CAUTIS</i> sp. nov.      | TUG 939-54    | Vasalemma                                     |
| total 1 specimen                         |               |                                               |
| <i>BELOITOCERAS</i> sp. indet            | TUG 1393-25   | Vasalemma Quarry, reef 27, flank<br>facies    |
| total 1 specimen                         |               |                                               |
| <i>ONCOCERIDA</i> indet                  | TUG 939-55    | Vasalemma                                     |

|                     |             |                  |
|---------------------|-------------|------------------|
| total 1 specimen    |             |                  |
| ONCOCERATIDAE indet | GIT 147-5b  | Vasalemma Quarry |
| total 1 specimen    |             |                  |
| CEPHALOPODA indet   | GIT 222-578 | Vasalemma Quarry |
| total 1 specimen    |             |                  |
