# Supplementary material
Source: publisher figshare collection journal article supplement (https://tandf.figshare.com/articles/dataset/_/5271625)
Supplement: Supplementary file 4 [file 1]

| <b>genus occurrences</b> | <b>Australia</b> | <b>NChina</b> | <b>Norway</b> | <b>SChina</b> | <b>USApp</b> | <b>USEast</b> | <b>USMid</b> | <b>Vasa</b> |
|--------------------------|------------------|---------------|---------------|---------------|--------------|---------------|--------------|-------------|
| Actinoceras              | 0                | 0             | 0             | 0             | 1            | 1             | 1            | 0           |
| Actinomorpha             | 0                | 0             | 0             | 0             | 0            | 0             | 1            | 0           |
| Allumettoceras           | 0                | 0             | 0             | 0             | 0            | 1             | 1            | 0           |
| Anaspyroceras            | 1                | 1             | 0             | 0             | 0            | 1             | 0            | 0           |
| Ancistroceras            | 0                | 0             | 0             | 1             | 0            | 0             | 0            | 0           |
| Antiphragmoceras         | 0                | 0             | 0             | 0             | 1            | 0             | 0            | 0           |
| Apsidoceras              | 0                | 0             | 1             | 0             | 0            | 0             | 0            | 0           |
| Armenoceras              | 0                | 0             | 0             | 0             | 0            | 1             | 0            | 0           |
| Augustoceras             | 0                | 0             | 0             | 1             | 0            | 0             | 0            | 0           |
| Bactroceras              | 0                | 0             | 0             | 2             | 0            | 0             | 0            | 0           |
| Beloitoceras             | 1                | 1             | 0             | 1             | 0            | 0             | 1            | 1           |
| Bodeiceras               | 0                | 0             | 0             | 0             | 0            | 0             | 1            | 0           |
| Broeggeroceras           | 0                | 0             | 1             | 0             | 0            | 0             | 0            | 0           |
| Cameroceras              | 0                | 0             | 0             | 0             | 0            | 1             | 0            | 0           |
| Cartersoceras            | 0                | 0             | 0             | 0             | 1            | 0             | 1            | 0           |
| Centrocyrtoceras         | 0                | 0             | 0             | 0             | 0            | 1             | 1            | 0           |
| Charchagoceras           | 0                | 0             | 0             | 1             | 0            | 0             | 0            | 0           |
| Chuannanoceras           | 0                | 0             | 0             | 1             | 0            | 0             | 0            | 0           |
| Cliefdenoceras           | 1                | 0             | 0             | 0             | 0            | 0             | 0            | 0           |
| Curtoceras               | 0                | 0             | 0             | 0             | 0            | 0             | 0            | 1           |
| Cyclolituites            | 0                | 0             | 0             | 1             | 0            | 0             | 0            | 0           |
| Cyrtocerina              | 0                | 0             | 0             | 0             | 0            | 0             | 1            | 0           |
| Cyrtorizoceras           | 0                | 0             | 0             | 0             | 0            | 1             | 1            | 0           |
| Deiroceras               | 0                | 0             | 0             | 0             | 0            | 1             | 1            | 0           |
| Dideroceras              | 0                | 0             | 0             | 1             | 0            | 0             | 0            | 0           |
| Diestoceras              | 0                | 0             | 1             | 0             | 0            | 0             | 0            | 0           |
| Discoceras               | 0                | 1             | 1             | 1             | 0            | 0             | 0            | 1           |
| Dongkalaceras            | 0                | 0             | 0             | 1             | 0            | 0             | 0            | 0           |
| Dunleithoceras           | 0                | 0             | 0             | 0             | 0            | 0             | 1            | 0           |
| Elongaticeras            | 0                | 0             | 0             | 1             | 0            | 0             | 0            | 0           |
| Endoceras                | 0                | 0             | 1             | 0             | 0            | 1             | 0            | 0           |
| Eosomichelinoceras       | 0                | 1             | 0             | 1             | 0            | 0             | 0            | 0           |
| Ehippiorthoceras         | 0                | 0             | 1             | 0             | 0            | 1             | 0            | 0           |
| Estonioceras             | 0                | 0             | 0             | 1             | 0            | 0             | 0            | 0           |
| Fayettoceras             | 0                | 0             | 0             | 0             | 0            | 0             | 1            | 0           |
| Fenggangoceras           | 0                | 0             | 0             | 1             | 0            | 0             | 0            | 0           |
| Fremontoceras            | 0                | 0             | 0             | 0             | 0            | 1             | 0            | 0           |
| Geisonoceras             | 0                | 0             | 0             | 0             | 0            | 1             | 1            | 0           |
| Gonioceras               | 0                | 0             | 0             | 0             | 1            | 1             | 1            | 0           |
| Gorbyoceras              | 0                | 0             | 0             | 0             | 1            | 1             | 1            | 0           |

|                      |   |   |   |   |   |   |   |   |
|----------------------|---|---|---|---|---|---|---|---|
| Gouldoceras          | 1 | 0 | 0 | 0 | 0 | 0 | 0 | 0 |
| Graciloceras         | 0 | 0 | 0 | 1 | 0 | 0 | 0 | 0 |
| Hanshanoceras        | 0 | 0 | 0 | 1 | 0 | 0 | 0 | 0 |
| Hecatoceras          | 1 | 0 | 0 | 0 | 0 | 0 | 0 | 0 |
| Hemibeloitoceras     | 0 | 0 | 0 | 0 | 0 | 0 | 0 | 1 |
| Hoeloceras           | 0 | 0 | 1 | 0 | 0 | 0 | 0 | 0 |
| Holeoceras           | 0 | 0 | 0 | 0 | 0 | 0 | 0 | 1 |
| Holmiceras           | 0 | 0 | 0 | 1 | 0 | 0 | 0 | 0 |
| Huanghuachangoceras  | 0 | 0 | 0 | 1 | 0 | 0 | 0 | 0 |
| Isorthoceras         | 0 | 0 | 0 | 0 | 0 | 1 | 1 | 1 |
| Jiangshanoceras      | 0 | 0 | 0 | 1 | 0 | 0 | 0 | 0 |
| Jingshanlingoceras   | 0 | 0 | 0 | 1 | 0 | 0 | 0 | 0 |
| Kentlandoceras       | 0 | 0 | 0 | 0 | 0 | 1 | 1 | 0 |
| Kionoceras           | 0 | 0 | 0 | 1 | 0 | 1 | 1 | 0 |
| Lituities            | 0 | 0 | 0 | 1 | 0 | 0 | 0 | 0 |
| Manitoulinoceras     | 0 | 0 | 0 | 0 | 0 | 1 | 1 | 0 |
| Metaspyroceras       | 0 | 1 | 0 | 0 | 1 | 1 | 1 | 0 |
| Miamoceras           | 1 | 0 | 0 | 0 | 0 | 0 | 0 | 0 |
| Monomuchites         | 0 | 0 | 0 | 0 | 0 | 0 | 1 | 0 |
| Murrayoceras         | 0 | 0 | 0 | 0 | 0 | 1 | 0 | 0 |
| Nanno                | 0 | 0 | 0 | 0 | 0 | 0 | 1 | 0 |
| Oncoceras            | 0 | 1 | 0 | 0 | 0 | 1 | 1 | 0 |
| Ordogeioceras        | 0 | 0 | 0 | 0 | 0 | 1 | 0 | 1 |
| Ormoceras            | 0 | 0 | 1 | 0 | 0 | 1 | 1 | 0 |
| Orthonybyoceras      | 0 | 0 | 0 | 0 | 0 | 0 | 0 | 1 |
| Paradiscoceras       | 1 | 0 | 0 | 0 | 0 | 0 | 0 | 0 |
| Plectoceras          | 0 | 0 | 0 | 0 | 0 | 0 | 1 | 0 |
| Pleurorthoceras      | 0 | 0 | 0 | 0 | 0 | 0 | 0 | 1 |
| Pojetoceras          | 0 | 0 | 0 | 0 | 0 | 0 | 1 | 0 |
| Polygrammoceras      | 0 | 0 | 1 | 1 | 0 | 0 | 0 | 0 |
| Proteoceras          | 0 | 0 | 0 | 0 | 0 | 0 | 1 | 0 |
| Protocycloceras      | 0 | 0 | 0 | 1 | 0 | 0 | 0 | 0 |
| Protokionoceras      | 0 | 0 | 1 | 1 | 0 | 0 | 0 | 0 |
| Pseudoocerina        | 0 | 0 | 0 | 1 | 0 | 0 | 0 | 0 |
| Rasmussenoceras      | 0 | 0 | 0 | 0 | 0 | 0 | 1 | 0 |
| Reedsoceras          | 0 | 0 | 0 | 0 | 0 | 1 | 1 | 0 |
| Rhynchorthoceras     | 0 | 0 | 1 | 1 | 0 | 0 | 0 | 0 |
| Richardsonoceras     | 0 | 0 | 0 | 2 | 0 | 0 | 1 | 0 |
| Richardsonocerooides | 0 | 0 | 0 | 1 | 0 | 0 | 0 | 0 |
| Rizoceras            | 0 | 0 | 0 | 1 | 0 | 0 | 0 | 0 |
| Rummoceras           | 0 | 0 | 0 | 0 | 0 | 0 | 0 | 1 |

|                   |   |   |   |   |   |   |   |   |
|-------------------|---|---|---|---|---|---|---|---|
| Sactoceras        | 0 | 0 | 0 | 1 | 0 | 0 | 0 | 0 |
| Sactorthoceras    | 0 | 0 | 0 | 1 | 0 | 0 | 0 | 0 |
| Schroederceras    | 0 | 1 | 0 | 0 | 0 | 0 | 0 | 0 |
| Scofieldoceras    | 0 | 0 | 0 | 0 | 0 | 0 | 1 | 0 |
| Sheshanoceras     | 0 | 1 | 0 | 0 | 0 | 0 | 0 | 0 |
| Sinoceras         | 0 | 0 | 0 | 1 | 0 | 0 | 0 | 0 |
| Spyroceras        | 0 | 0 | 0 | 0 | 0 | 1 | 1 | 0 |
| Staufferoceras    | 0 | 0 | 0 | 0 | 0 | 0 | 1 | 0 |
| Stereospyroceras  | 0 | 0 | 0 | 1 | 0 | 0 | 0 | 0 |
| Striatocycloceras | 0 | 0 | 0 | 0 | 0 | 1 | 0 | 1 |
| Subspyroceras     | 0 | 0 | 0 | 0 | 0 | 1 | 0 | 0 |
| Suecoceras        | 0 | 0 | 0 | 1 | 0 | 0 | 0 | 0 |
| Tasmanoceras      | 1 | 0 | 0 | 0 | 0 | 0 | 0 | 0 |
| Trilacinoceras    | 0 | 0 | 0 | 1 | 0 | 0 | 0 | 0 |
| Trocholites       | 1 | 1 | 0 | 0 | 0 | 1 | 0 | 1 |
| Tyrioceras        | 0 | 0 | 1 | 0 | 0 | 0 | 0 | 0 |
| Vaginoceras       | 0 | 0 | 0 | 1 | 0 | 0 | 0 | 0 |
| Vasalemmoceras    | 0 | 0 | 0 | 0 | 0 | 0 | 0 | 1 |
| Wetherbyoceras    | 0 | 0 | 0 | 0 | 1 | 0 | 0 | 0 |
| Whitfieldoceras   | 0 | 0 | 0 | 0 | 0 | 1 | 1 | 0 |
| Winnipegoceras    | 0 | 0 | 0 | 1 | 0 | 0 | 0 | 0 |
| Xuanenoceras      | 0 | 0 | 0 | 1 | 0 | 0 | 0 | 0 |
| Yangjiapingoceras | 0 | 0 | 0 | 1 | 0 | 0 | 0 | 0 |
| Yanwashanoceras   | 0 | 0 | 0 | 1 | 0 | 0 | 0 | 0 |
| Zeehanoceras      | 1 | 0 | 0 | 0 | 0 | 0 | 0 | 0 |
| Zitteloceras      | 0 | 0 | 0 | 0 | 0 | 1 | 1 | 0 |

| order           | occurrences | Vasalemma | Norway | Australia | NChina | SChina | USMid | USEast |
|-----------------|-------------|-----------|--------|-----------|--------|--------|-------|--------|
| Actinocerida    | 5           | 2         | 0      | 0         | 0      | 4      | 5     |        |
| Barrandeocerida | 2           | 1         | 0      | 0         | 0      | 1      | 2     |        |
| Cyrtocerina     | 1           | 0         | 0      | 0         | 0      | 0      | 0     |        |
| Discosorida     | 3           | 1         | 3      | 0         | 4      | 2      | 1     |        |
| Ellesmerocerida | 0           | 0         | 0      | 0         | 1      | 0      | 0     |        |
| Endocerida      | 0           | 1         | 0      | 0         | 3      | 1      | 2     |        |
| Lituitida       | 0           | 2         | 0      | 1         | 9      | 1      | 1     |        |
| Oncocerida      | 4           | 1         | 3      | 2         | 10     | 14     | 6     |        |
| Orthocerida     | 8           | 2         | 1      | 4         | 12     | 10     | 12    |        |
| Tarphycerida    | 5           | 1         | 3      | 3         | 2      | 2      | 1     |        |





**USApp**

2  
0  
0  
1  
0  
0  
1  
1  
2  
0

| Sources   | Stratigraphic Unit                                                                                             | References                                                                                                                                                                                                                                                                                                                   |
|-----------|----------------------------------------------------------------------------------------------------------------|------------------------------------------------------------------------------------------------------------------------------------------------------------------------------------------------------------------------------------------------------------------------------------------------------------------------------|
| Vasalemma | Vasalemma Limestone Formation                                                                                  | Kröger, B. & Aubrechtova, M                                                                                                                                                                                                                                                                                                  |
| Norway    | 4bβ<br>4bδ<br>Encrinite Limestone<br>Lower Chasmops Limestone<br>Mjøsa Limestone                               | Strand, T., 1934, The Upper<br>Sweet, W.C., 1958, The Mid                                                                                                                                                                                                                                                                    |
| Australia | Benjamin Limestone<br>Daylesford Limestone<br>Fossil Hill Limestone<br>Gordon Limestone                        | Stait, B., 1980, Gouldoceras<br>Stait, Bryan 1982. Ordovician<br>Stait, B., Laurie J., 1984, Ordovician<br>Stait, B.A., 1988, Tasmanian<br>Stait, B., Webby, B.D., and F<br>Teichert, C., and Glenister, I<br>Teichert, C., and Glenister, I                                                                                 |
| NChina    | Sheshan Formation                                                                                              | Chen, Jun-yuan & Zou Xi-pe                                                                                                                                                                                                                                                                                                   |
| SChina    | Baota Formation                                                                                                | Chen, Jun-yuan & Liu Geng-<br>Chen, J.-., 1974, Ordovician<br>Lai, C.-., 1965, Ordovician a<br>Lai, C.-., 1986, Ordovician c<br>Lai, C.-., 1987, Ordovician c<br>Qi, Dun-lun 1980. Ordovician<br>Qi, D.-l. 1984. Middle Ordov<br>Wang, Ru-zhi 1978 In: Xinar<br>Xu, G.-, and Lai, C.-., 1987, C<br>Yang, Sheng-wu 1978. Naut |
| USApp     | Carters Limestone<br>Chambersburg Limestone<br>Lowville Limestone<br>Martinsburg Shale<br>Tyrone Limestone     | Flower, Rousseau H. 1964.<br>Foerste, August Frederick &<br>Foerste, August Frederick 1<br>Foerste, August Frederick 1<br>Frey, R.C., 1995, Middle and                                                                                                                                                                       |
| USEast    | Lowville Limestone<br>Poland Member<br>Rocklandian<br>Sherman Fall Limestone<br>Trenton<br>Watertown Limestone | Flower, Rousseau H. 1947. I<br>Flower, Rousseau H. 1952. I<br>Foerste, August Frederick &<br>Foerste, August Frederick 1<br>Foerste, August Frederick 1<br>Foerste, August A. 1928. A r<br>Hall, James 1847. Natural h                                                                                                       |
| USMid     | Cannon Limestone<br>Curdsville Limestone<br>Decorah Member<br>Grier Limestone                                  | Flower, Rousseau H. 1943. S<br>Flower, Rousseau H. 1952. I<br>Foerste, August Frederick &<br>Foerste, August Frederick 1                                                                                                                                                                                                     |

|                    |                              |
|--------------------|------------------------------|
| Guttenberg Member  | Foerste, August Frederick 1  |
| Logana Member      | Foerste, August Frederick 1  |
| Platteville Member | Foerste, August Frederick 1  |
| Shermanian         | Frey, R.C., 1995, Middle and |
| Tyrone Limestone   | McKelvey, V. E. 1939. An Or  |





Al., 2016. Cephalopods from reef limestone of the Vasalemma Formation, northern Estonia (latest Ordovician Cephalopods of the Oslo Area: Norsk geologiske Tidsskrift v. 14, p, 1–117.  
 Early Ordovician of the Oslo region of Norway. 10. Nautiloid cephalopods: Norsk Geologiske Tidsskrift

new gen. (Cephalopoda, Nautiloidea) and a revision of Hecaticeras, Teichert and Glenister, from the Ordovician Oncoceratida (Nautiloidea) from Tasmania. Neues Jahrbuch für Geologie und Paläontologie Monatshefte v. 1984. Ordovician nautiloids of central Australia, with a revision of Madiganella Teichert & Glenister: BMR Journal v. 1984. Ordovician nautiloid faunas - biostratigraphy, biogeography and morphology: Senckenbergiana Lethaea v. 64. Percival, I.G., 1985, Late Ordovician nautiloids from Central New South Wales, Australia: Alcheringa v. 1. B.F., 1952, Fossil nautiloid faunas from Australia: Journal of Paleontology v. 26, p, 730–752. B.F., 1953, Ordovician and Silurian cephalopods from Tasmania.: Bulletins of American Paleontology v. 1953. 1984. Ordovician cephalopods from the Ordos area, China. Memoirs Nanjing Inst. Geol. Palaeontology v. 1984. Ordovician and Silurian Nautiloidea. In: A Handbook of the Stratigraphy and Paleontology of China v. 1. Nautiloidea, in Paleontology, N.I.O.G.A., ed., A Handbook of the Stratigraphy and Paleontology of China v. 1. Ordovician and Silurian cephalopods from Hanzhong and Ningxiang of Shensi: Acta Palaeontologica Sinica v. 1984. Ordovician cephalopods from Mt. Altun area, N.W. China: Acta Palaeontologica Sinica v. 25, p, 248–256. Ordovician cephalopods from Mt. Querquert (Mt. Charchag), Xinjiang: Professional Papers in Stratigraphy and Paleontology v. 1984. Ordovician cephalopods from Wuwei of Anhui and their stratigraphical significance. Acta palaeontologica Sinica v. 1984. Ordovician cephalopods from Anhui and Zhejiang. Acta palaeontologica sinica, 23: 271-274, Beijing [English]. 1984. Ordovician cephalopods from Southwestern China. Sichuan fasc., vol. 1, Sinian to Devonian, 402-433. Ordovician cephalopods, in Sciences, C.A.O.G., ed., Biostratigraphy of the Yangtze Gorge area, Volume 2, Earth and Planetary Science v. 1984. Nautiloidea. In: Palaeontological Atlas of southwestern China. Guizhou volume, 1: 358-379, Geological Science Press, Beijing. The nautiloid order Ellesmeroceratida (Cephalopoda). New Mexico Institute of Mining and Technology v. 1984. Curt Teichert 1930. The Actinoceroids of East-central North America. Denison University Bulletin v. 1930. 1925. Notes on Cephalopod Genera, Chiefly Coiled Silurian Forms. Journal of the Scientific Laboratory v. 1930. 1932. Black River and other cephalopods from Minnesota, Wisconsin, Michigan, and Ontario (Part I). Journal of the Cincinnati Society of Naturalists v. 1932. Upper Ordovician Cephalopods of the Cincinnati Region of Kentucky, Indiana, and Ohio: United States Geological Survey Bulletin v. 1932. New Ordovician nautiloids from New York. Journal of Paleontology, 21: 429-433, Tulsa, Oklahoma. New Ordovician cephalopods from eastern North America. Journal of Paleontology, 26: 24-59, Tulsa, Oklahoma. Curt Teichert 1930. The Actinoceroids of East-central North America. Denison University Bulletin v. 1930. 1928. American Arctic and Related Cephalopod. Denison University Bulletin, Journal of the Scientific Laboratory v. 1928. A restudy of some of the Ordovician and Silurian cephalopods described by Hall. Denison University Bulletin v. 1928. A restudy of American orthoconic Silurian cephalopods. Denison University Bulletin, Journal of the Scientific Laboratory v. 1928. History of New York, Paleontology, vol.1, containing descriptions of the organic remains of the lower Silurian. Structure and relationship of Cincinnati *Cyrtoceras*. The Ohio Journal of Science, 43: 51-64, Columbus, Ohio. New Ordovician cephalopods from eastern North America. Journal of Paleontology, 26: 24-59, Tulsa, Oklahoma. Curt Teichert 1930. The Actinoceroids of East-central North America. Denison University Bulletin v. 1930. 1912. *Strophomena* and other fossils from Cincinnati and Mohawkian horizons, chiefly in Ohio,

930. Three studies on cephalopods. Journal of the Scientific Laboratories of Denison University, 2
932. Black River and other cephalopods from Minnesota, Wisconsin, Michigan, and Ontario (Part
933. Black River and other cephalopods from Minnesota, Wisconsin, Michigan, and Ontario (Part
- 1 Upper Ordovician Cephalopods of the Cincinnati Region of Kentucky, Indiana, and Ohio: United
- Ordovician *Zitteloceras* from Wisconsin. Journal of Paleontology, 13: 74-76, Menasha, Wisconsin



t Sandbian, Upper Ordovician) and the establishment of a local warm water fauna. Journal of Systematic Zoology v. 31, p, 1–178.

the Ordovician of Tasmania, Australia: Journal of Paleontology v. 54, p, 1113–1118.

Monatshefte, 1982: 607-618, Stuttgart.

Journal of the Australian Geology and Geophysics v. 9, p, 261–266.

1959, p, 87–107.

Journal of Geology v. 9, p, 143–157.

Journal of Geology v. 34, p, 1–54.

Journal of Geology, 20: 33-111, Nanjing.

Journal of Geology in Southwest China, 138-143, 190-194, Beijing.

Journal of Southwest China: Nanjing, Academia Sinica, p. 138–143.

Journal of Geology, 3, p, 308–335.

Journal of Palaeontology v. 17, p, 227–246.

Academia Sinica, 19: 245-260, Beijing [English abstract, pp.260-261].

English abstract, p.275].

1930., Beijing, Geological Press.

Early Palaeozoic area: Beijing, Geological Publishing House, p. 713.

Geological Publishing House, Beijing.

Geology, State Bureau of Mines and Mineral Resources, Memoir 12: 1-164, Socorro, New Mexico

1, Journal of the Scientific Laboratories, 25: 201-296, Granville, Ohio.

Geological Survey of Denison University, 21: 1-69, Granville, Ohio.

1). Journal of Scientific Laboratories of Denison University, 27: 47-136, Granville, Ohio.

United States Geological Survey Professional Paper v. 1066P, p, 1–119.

3

Isa, Oklahoma

1, Journal of the Scientific Laboratories, 25: 201-296, Granville, Ohio.

Scientific Laboratories, 23: 1-110, Granville, Ohio.

University Bulletin, Journal of the Scientific Laboratories, 23: 173-230, Granville, Ohio.

Scientific Laboratories, 23: 236-320, Granville, Ohio.

Lower division of the New-York system (equivalent of the Lower Silurian rocks of Europe). New York Geological Survey Professional Paper v. 1066P, p, 1–119.

Isa, Oklahoma

1, Journal of the Scientific Laboratories, 25: 201-296, Granville, Ohio.

Indiana, and Kentucky. Bulletin of the Scientific Laboratories of Denison University, 17: 17-172, G

4: 265-381, Granville, Ohio.

1). Journal of Scientific Laboratories of Denison University, 27: 47-136, Granville, Ohio.

2). Denison University, Bulletin, Journal of Scientific Laboratories, 28: 1-136, Granville, Ohio.

States Geological Survey Professional Paper v. 1066P, p, 1–119.



tematic Palaeontology, xx

geological Survey, 338 p., Van Benthuyzen, Albany.

ranville, Ohio.
